# Supplementary material
Source: Springer Nature journal article supplement (https://www.springermedizin.de/resource/supplementary/12933_2013_791_MOESM3_ESM.pdf/9539222)

## A Subgroups with dyslipidaemia

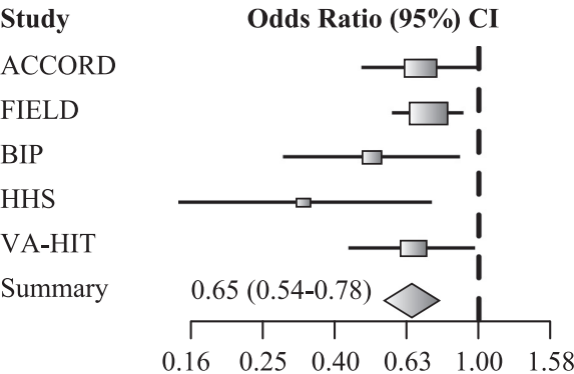

## B Complementary subgroups

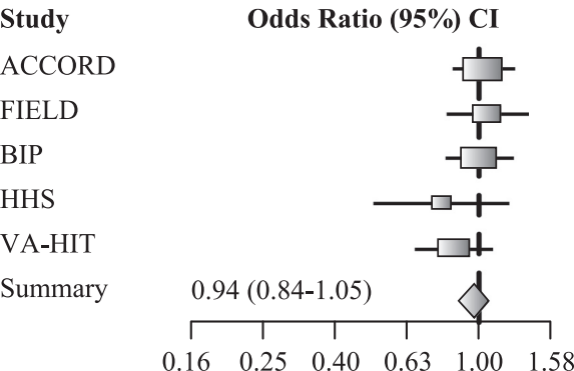

Supplement: MOESM3 [file 9539222]
